# Supplementary material
Source: HighWire-hosted journal article supplement (http://www.qdcxjkg.com/highwire/filestream/130219/field_highwire_adjunct_files/0/ERJ-00393-2016_Supplementary_data.pdf)
Supplement: ERJ-00393-2016_Supplementary_data.pdf [file ERJ-00393-2016_Supplementary_data.pdf]

## SUPPLEMENTARY MATERIAL

**Supplemental Table S1.** Participant listing of demographic and other measurements

| Subject    | Demographics |           |                          | Questionnaires and Exacerbation History |           |            |                 |           |                    |                | Spirometry            |                               |                   | Ventilation Heterogeneity          |                    |                  |
|------------|--------------|-----------|--------------------------|-----------------------------------------|-----------|------------|-----------------|-----------|--------------------|----------------|-----------------------|-------------------------------|-------------------|------------------------------------|--------------------|------------------|
|            | Age (yrs)    | Sex (M/F) | BMI (kg/m <sup>2</sup> ) | Duration (yrs)                          | ACQ Score | AQLQ Score | Dyspnoea Scores |           | Exacerbations (n)* | ED visits (n)* | Hospitalizations (n)* | FEV <sub>1</sub> Pre/Post (L) | FVC Pre/Post (L)  | FEV <sub>1</sub> /FVC Pre/Post (%) | LCI Pre/Post       | VDP Pre/Post (%) |
|            |              |           |                          |                                         |           |            | mMRC            | Borg      |                    |                |                       |                               |                   |                                    |                    |                  |
| 001        | 34           | F         | 40                       | 16                                      | -         | -          | -               | -         | 0/2                | 0/0            | 0/0                   | 2.2/2.5                       | 3.0/3.2           | 74/80                              | 9.5/8.8            | 12/10            |
| 002        | 67           | M         | 28                       | 7                                       | -         | -          | -               | -         | 0/0                | 0/0            | 0/0                   | 3.1/3.4                       | 4.8/5.0           | 66/68                              | 12.6/8.8           | 11/6             |
| 003        | 61           | M         | 33                       | 7                                       | 2.1       | 4.6        | 0.0             | 4.0       | 1/3                | 0/0            | 0/0                   | 2.7/3.4                       | 5.0/5.8           | 54/59                              | 13.4/12.1          | 30/17            |
| 004        | 60           | F         | 33                       | 39                                      | 4.3       | 3.2        | 3.0             | 9.0       | 2/4                | 0/2            | 0/0                   | 1.0/0.9                       | 2.1/2.0           | 46/46                              | 14.0/14.4          | 35/20            |
| 005        | 38           | F         | 30                       | 36                                      | 1.9       | 5.9        | 1.0             | 1.0       | 0/1                | 0/0            | 0/0                   | 1.4/1.6                       | 1.7/2.0           | 82/79                              | 11.5/9.3           | 7/6              |
| 006        | 45           | M         | 25                       | 44                                      | 2.7       | 4.7        | 1.0             | 1.0       | 0/0                | 0/0            | 0/0                   | 1.5/1.6                       | 3.3/3.4           | 44/47                              | 11.5/10.6          | 14/11            |
| 007        | 55           | F         | 33                       | 20                                      | 1.4       | 5.0        | 1.0             | 3.0       | 0/1                | 0/0            | 0/0                   | 2.1/2.3                       | 2.9/3.1           | 71/76                              | 9.7/9.3            | 2/3              |
| 008        | 47           | F         | 30                       | 34                                      | 2.3       | 5.3        | 2.0             | 2.0       | 2/5                | 1/1            | 0/0                   | 3.0/3.0                       | 3.7/3.6           | 80/83                              | 6.3/7.1            | 2/2              |
| 009        | 21           | F         | 20                       | 18                                      | 2.7       | 3.1        | 2.0             | 5.0       | 0/5                | 0/0            | 0/0                   | 3.4/3.5                       | 3.8/3.7           | 88/94                              | 7.0/7.3            | 1/2              |
| 010        | 45           | F         | 31                       | 41                                      | 1.6       | 4.0        | 0.0             | 0.5       | 4/18               | 0/0            | 0/0                   | 3.0/3.3                       | 3.8/3.8           | 78/86                              | 7.4/6.6            | 4/1              |
| 011        | 40           | F         | 29                       | 27                                      | 2.3       | 4.8        | 1.0             | 1.0       | 6/12               | 0/0            | 0/0                   | 2.1/2.4                       | 3.3/3.4           | 65/72                              | 10.6/9.8           | 18/7             |
| 012        | 31           | F         | 37                       | 28                                      | 2.0       | 5.8        | 2.0             | 1.0       | 3/4                | 0/3            | 0/1                   | 0.9/1.4                       | 2.3/3.1           | 42/46                              | 13.4/NA            | 15/5             |
| 013        | 56           | M         | 25                       | 55                                      | 3.1       | 4.2        | -               | -         | 2/3                | 0/0            | 0/0                   | 1.5/1.5                       | 4.4/4.2           | 35/37                              | 17.5/15.5          | 33/29            |
| 014        | 44           | F         | 27                       | 23                                      | 1.0       | 5.6        | 1.0             | 0.5       | 0/1                | 0/0            | 0/0                   | 2.9/3.0                       | 3.8/3.9           | 74/79                              | 7.7/7.3            | 3/2              |
| 015        | 42           | M         | 33                       | 28                                      | 1.4       | 4.6        | 1.0             | 2.0       | 0/0                | 0/0            | 0/0                   | 2.7/3.1                       | 4.0/4.4           | 67/71                              | 9.5/10.1           | 8/4              |
| 016        | 48           | M         | 30                       | 46                                      | 2.3       | 5.5        | 0.0             | 3.0       | 0/1                | 0/0            | 0/0                   | 2.9/3.2                       | 4.2/4.4           | 69/72                              | 8.6/8.2            | 8/8              |
| 017        | 39           | F         | 22                       | 36                                      | 1.7       | 6.1        | 1.0             | 0.5       | 5/7                | 0/0            | 0/0                   | 2.2/2.4                       | 4.0/3.9           | 56/62                              | 6.7/6.1            | 3/2              |
| 018        | 59           | F         | 23                       | 57                                      | 4.3       | 1.7        | 3.0             | 4.0       | 4/8                | 0/1            | 0/0                   | 1.4/1.6                       | 1.9/2.7           | 71/58                              | 11.6/11.0          | 15/16            |
| Mean (±SD) | 46 (12)      | 12F/6M    | 29 (5)                   | 31 (15)                                 | 2.3 (0.9) | 4.6 (1.2)  | 1.3 (1.0)       | 2.5 (2.3) | 9(50%)/15(83%)     | 1(6%)/4(22%)   | 0(0%)/1(6%)           | 2.2(0.8)/2.5(0.8)             | 3.5(1.0)/3.6(1.0) | 65(15)/68(16)                      | 10.5(3.0)/9.5(2.7) | 12(11)/8(8)      |

SD=standard deviation; M=Male; F=Female; BMI=body mass index; ACQ=asthma control questionnaire; AQLQ=asthma quality of life questionnaire; mMRC=modified Medical Research Council; ED=emergency department; FEV<sub>1</sub>=forced expiratory volume in 1 second; FVC=forced vital capacity; LCI=lung clearance index; VDP=ventilation defect percent.

\*in previous 6 months/in previous year.

**Supplemental Table S2. Participant listing of asthma medications**

| Subject | SABA        |            | LABA       |    | LAAC       |                   | ICS                            |          | OCS        |      | LTRA        |    | Anti-IgE   |     |
|---------|-------------|------------|------------|----|------------|-------------------|--------------------------------|----------|------------|------|-------------|----|------------|-----|
|         |             |            | Dose(µg/d) |    | Dose(µg/d) |                   | Dose(µg/d)                     |          | Dose(mg/d) |      | Dose(mg/d)  |    | Dose(mg)   |     |
| 001     | Salbutamol  | Formoterol | 12         | -- | --         |                   | Budesonide                     | 400      | Prednisone | 4    | --          | -- | --         | --  |
| 002     | Salbutamol  | Formoterol | 24         | -- | --         |                   | Budesonide                     | 800      | Prednisone | 12.5 | --          | -- | --         | --  |
| 003     | Salbutamol  | Formoterol | 24         |    | 18         | Tiotropium        | Budesonide                     | 800      | Prednisone | 20   | Montelukast | 10 | --         | --  |
| 004     | Salbutamol  | Salmeterol | 100        |    | 18         | Tiotropium        | Fluticasone                    | 2500     | Prednisone | 50   | Montelukast | 10 | --         | --  |
| 005     | Salbutamol  | Formoterol | 36         | -- | --         |                   | Budesonide/Beclometasone       | 1200/800 | Prednisone | 2.5  | --          | -- | --         | --  |
| 006     | Salbutamol  | Formoterol | 20         |    | 18         | Tiotropium        | Mometasone furoate/Fluticasone | 800/1000 | --         | --   | Montelukast | 10 | --         | --  |
| 007     | Salbutamol  | Formoterol | 24         |    | 18         | Tiotropium        | Budesonide                     | 1600     | Prednisone | 7.5  | --          | -- | --         | --  |
| 008     | Salbutamol  | Salmeterol | 100        | -- | --         |                   | Fluticasone                    | 1000     | --         | --   | Montelukast | 10 | --         | --  |
| 009     | Terbutaline | Formoterol | 24         | -- | --         |                   | Budesonide                     | 800      | --         | --   | Montelukast | 10 | --         | --  |
| 010     | Salbutamol  | Salmeterol | 100        | -- | --         |                   | Fluticasone                    | 1500     | --         | --   | Montelukast | 10 | --         | --  |
| 011     | Salbutamol  | Formoterol | 24         | -- | --         |                   | Budesonide/Ciclesonide         | 800/800  | Prednisone | 7.5  | Montelukast | 10 | --         | --  |
| 012     | Salbutamol  | Salmeterol | 100        |    | 18         | Tiotropium        | Fluticasone/Ciclesonide        | 1000/400 | Prednisone | 3    | Montelukast | 10 | --         | --  |
| 013     | Salbutamol  | Salmeterol | 100        |    | 18         | Tiotropium        | Fluticasone                    | 1000     | --         | --   | --          | -- | --         | --  |
| 014     | Salbutamol  | Formoterol | 24         | -- | --         |                   | Budesonide                     | 800      | --         | --   | --          | -- | --         | --  |
| 015     | Salbutamol  | Formoterol | 24         | -- | --         |                   | Budesonide                     | 1200     | --         | --   | --          | -- | --         | --  |
| 016     | Salbutamol  | Formoterol | 24         | -- | --         |                   | Budesonide/Ciclesonide         | 800/800  | --         | --   | --          | -- | Omalizumab | 150 |
| 017     | Salbutamol  | Formoterol | 24         | -- | --         |                   | Budesonide                     | 800      | --         | --   | Montelukast | 10 | --         | --  |
| 018     | Salbutamol  | Formoterol | 20         |    | 800        | Acidinium bromide | Mometasone furoate/Ciclesonide | 800/800  | --         | --   | --          | -- | --         | --  |

SABA=Short-acting β-agonist; LABA=Long-acting β-agonist; LAAC=Long-acting anticholinergics; ICS=Inhaled corticosteroids; OCS=Oral corticosteroids; LTRA=Leukotriene receptor antagonists; Anti-IgE=Anti-immunoglobulin E.

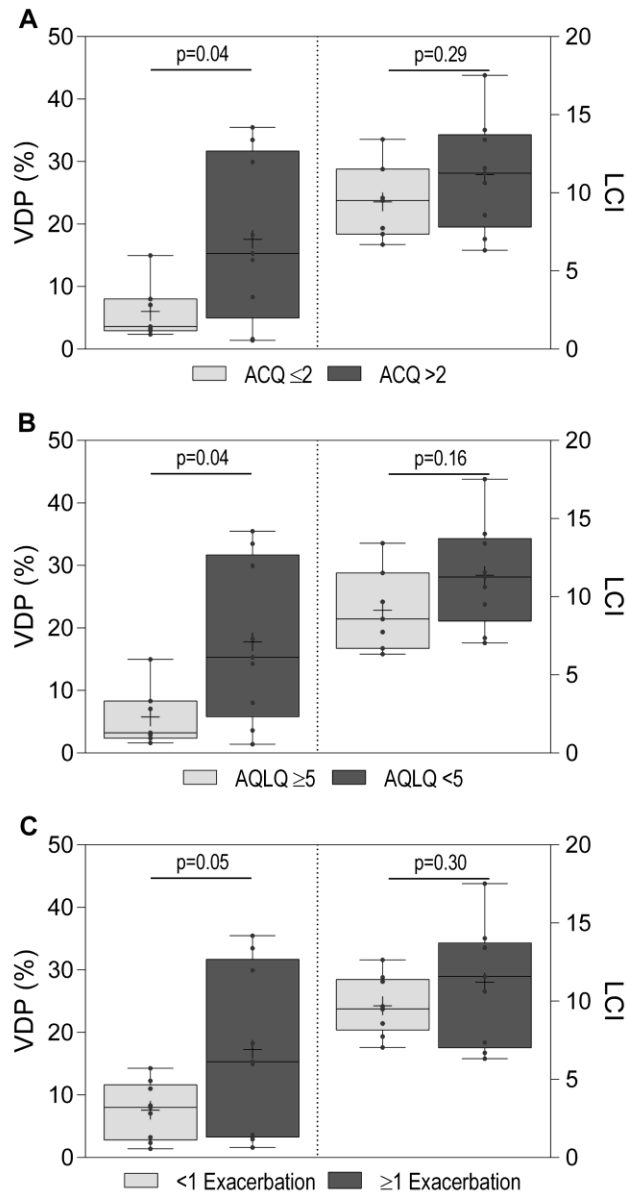

**Supplemental Figure S1. Ventilation heterogeneity stratified by ACQ and AQLQ scores and self-reported exacerbations**

- A) Significantly worse VDP ( $>2$  ACQ, VDP=18±13%;  $\leq 2$  ACQ, VDP=6±5,  $p=0.04$ ), but not LCI ( $>2$  ACQ, LCI=11.2±3.6; ACQ $\leq 2$ , LCI=9.4±2.4,  $p=0.29$ ) for subjects with ACQ  $>2$ .
- B) Significantly worse VDP (AQLQ $<5$ , VDP=18±13; AQLQ $\geq 5$ , VDP=6±5,  $p=0.04$ ), but not LCI (AQLQ $<5$ , LCI=11.4±3.3; AQLQ $\geq 5$ , LCI= 9.1±2.6,  $p=0.16$ ), for subjects with AQLQ total scores  $<5$ .
- C) There was a trend towards greater VDP (exacerbations  $\geq 1$ , VDP=17±13%; exacerbations $<1$ , VDP=8±5%;  $p=0.053$ ), but not LCI (exacerbations  $\geq 1$ , LCI=11.2±3.8 exacerbations $<1$ , LCI= 9.7±1.8;  $p=0.3$ ), for subjects with  $\geq 1$  exacerbation in past 6-months.

Box-and-whiskers plots show minimum, 25<sup>th</sup> percentile, median, 75<sup>th</sup> percentile, and maximum with each individual value superimposed on the graph. += mean. ACQ=asthma control questionnaire; AQLQ=asthma quality of life questionnaire; LCI=lung clearance index; VDP=ventilation defect percent.

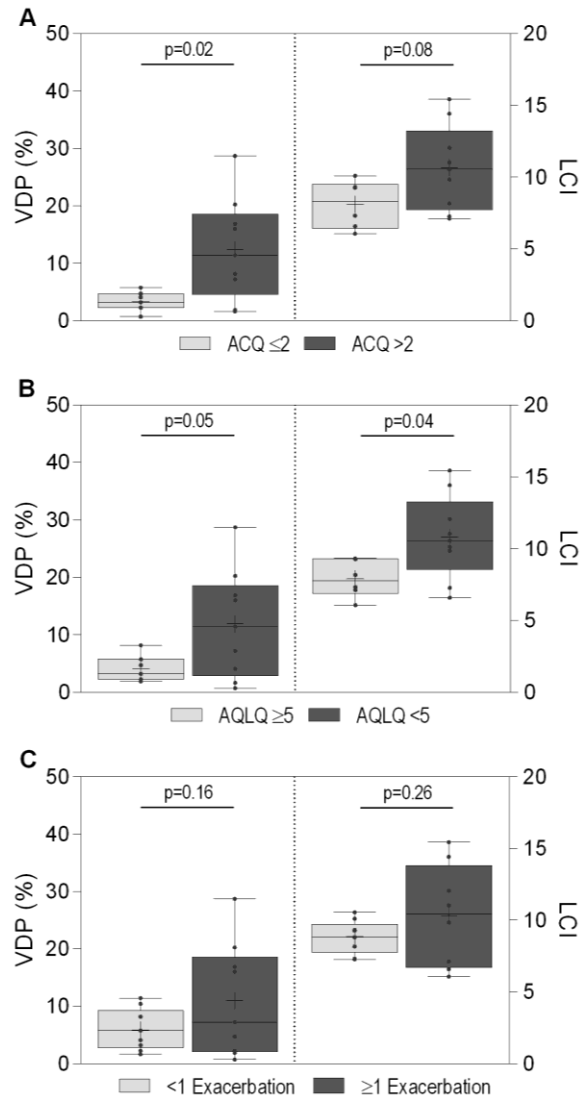

**Supplemental Figure S2. Post-bronchodilator ventilation heterogeneity stratified by ACQ and AQLQ scores and self-reported exacerbations**

- A) Significantly worse post-bronchodilator VDP ( $>2$  ACQ, VDP=12 $\pm$ 9%;  $\leq 2$  ACQ, VDP=3 $\pm$ 2,  $p=0.02$ ), but not post-bronchodilator LCI ( $>2$  ACQ, LCI=10.7 $\pm$ 3.0; ACQ $\leq 2$ , LCI=8.1 $\pm$ 1.7,  $p=0.08$ ) for subjects with ACQ  $>2$ .
- B) There was a trend towards worse post-bronchodilator VDP (AQLQ $<5$ , VDP=12 $\pm$ 9; AQLQ $\geq 5$ , VDP=4 $\pm$ 2,  $p=0.05$ ) and post-bronchodilator LCI was significantly worse (AQLQ $<5$ , LCI=10.8 $\pm$ 2.9; AQLQ $\geq 5$ , LCI= 7.9 $\pm$ 1.3,  $p=0.04$ ) for subjects with AQLQ total scores  $<5$ .
- C) Post-bronchodilator VDP (exacerbations  $\geq 1$ , VDP=11 $\pm$ 10%; exacerbations $<1$ , VDP=6 $\pm$ 4%;  $p=0.16$ ) and post-bronchodilator LCI (exacerbations  $\geq 1$ , LCI=10.3 $\pm$ 3.6 exacerbations $<1$ , LCI= 8.9 $\pm$ 1.3;  $p=0.26$ ), were not different for subjects with  $\geq 1$  exacerbation in past 6-months.

Box-and-whiskers plots show minimum, 25<sup>th</sup> percentile, median, 75<sup>th</sup> percentile, and maximum with each individual value superimposed on the graph. += mean. ACQ=asthma control

questionnaire; AQLQ=asthma quality of life questionnaire; LCI=lung clearance index;  
VDP=ventilation defect percent.

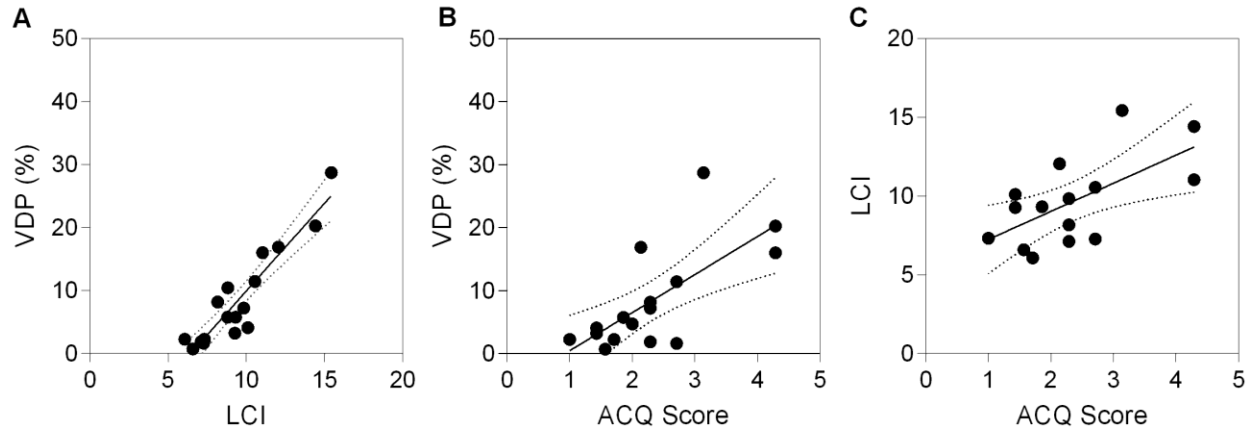

**Supplemental Figure S3. Relationship for post-bronchodilator ventilation heterogeneity and asthma control**

- A) Post-bronchodilator VDP was significantly correlated with post-bronchodilator LCI ( $r=0.89$ ,  $r^2=0.86$ ,  $p<0.0001$ ,  $y=2.8x-18.0$ ).
- B) Post-bronchodilator VDP was significantly correlated with ACQ ( $r=0.59$ ,  $r^2=0.50$ ,  $p=0.02$ ,  $y=6.0x-5.6$ ).
- C) Post-bronchodilator LCI was significantly correlated with ACQ ( $r=0.63$ ,  $r^2=0.39$ ,  $p=0.01$ ,  $y=1.8x+5.5$ ).

Dotted lines=95% confidence intervals; ACQ=asthma control questionnaire; LCI=lung clearance index; VDP=ventilation defect percent.

## Supplemental Text

We note that we have previously observed but not reported, that patients with severe asthma and eosinophilic bronchitis often do not exhibit bronchodilator reversibility but it reappears when the eosinophilic bronchitis is controlled. We did not investigate the mechanisms underlying this but there are a number of potential reasons that may be explained by our current results. One of these could be that when the airway lumen is filled with cells, bronchodilators cannot improve airway calibre any further. Another reason is that eosinophil granular cationic products could potentially induce a beta-receptor dysfunction that improves when the eosinophilia is controlled. A third explanation, recently supported by Wenzel and colleagues [1] is that IL-13 (that may induce eosinophilia and airway hyper-responsiveness) may contribute to beta-receptor dysfunction.

Therefore, assuming that the dose of prednisone was optimally used in the current study, it might be expected that a greater bronchodilator response (and change in VDP) would be observed in patients who were not treated with prednisone (and who presumably had ongoing inflammation). This bronchodilator response, could very well be mediated by airway hyper-responsiveness that is mediated through a less-steroid sensitive pathway (for example smooth muscle dysfunction, residual IL-13 effects, etc).

## Reference List

1. Albano GD, Zhao J, Etling EB, Park SY, Hu H, Trudeau JB, Profita M, Wenzel SE. IL-13 desensitizes beta2-adrenergic receptors in human airway epithelial cells through a 15-lipoxygenase/G protein receptor kinase 2 mechanism. *J Allergy Clin Immunol* 2015; 135: 1144-1153 e1141-1149.
